# Supplementary material for: High-Throughput Screening Method Using Escherichia coli Keio Mutants for Assessing Primary Damage Mechanism of Antimicrobials
Source: MDPI journal article supplement (doi:10.3390/microorganisms12040793), 2024-04-14

**Supplementary Figure S1.** Characterization of AgNPs

suspension: a) the impact of the increase of the NPs size

distribution at different NPs concentrations by DLS

analysis, b) photographs of the AgNPs suspensions using

different dispersant agents (800 µg/mL) after 1 hour of

ultrasound sonication (2 min, 60% amplitude); c) UV-VIS

spectra of AgNPs suspension after 30, 60, 90, and 120

min of ultrasound sonication; d) TEM micrograph of Gram-

negative bacteria in contact with 400 µg/mL of AgNPs.

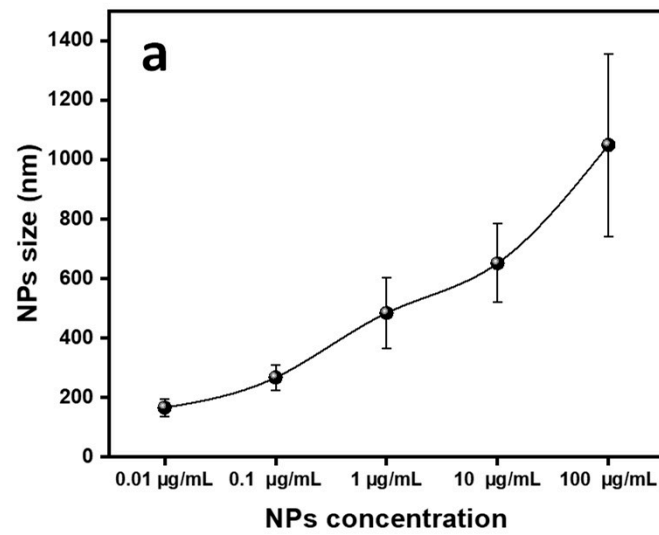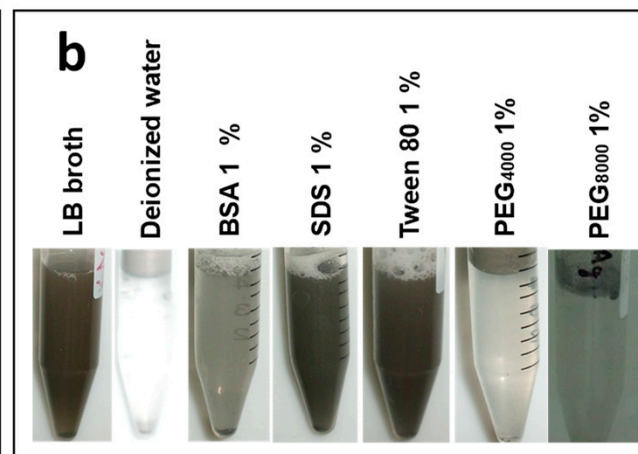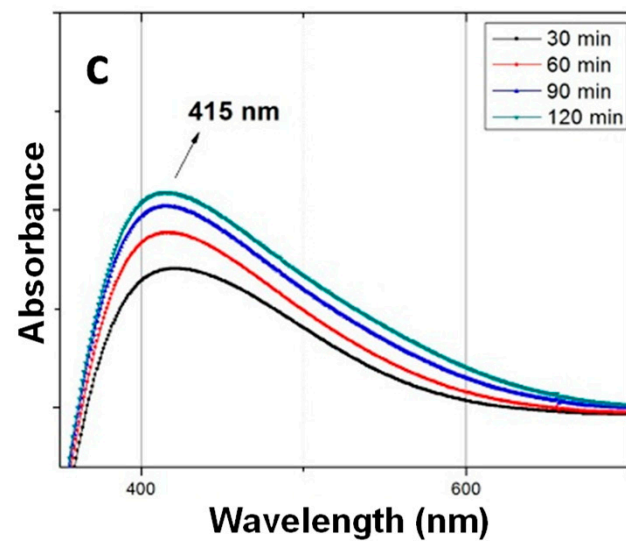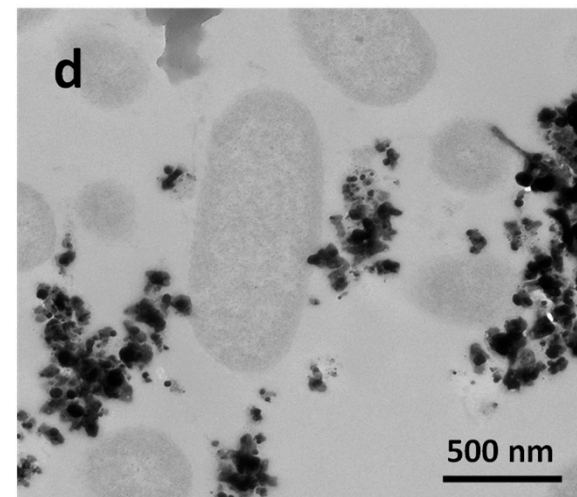

**Supplementary Figure S2.** Complementary to the results of the  $\Delta recA$  mutant strain, DH5 $\alpha$  cells were challenged with silver NPs since this strain carries a RecA1 mutant protein. The conditions were the same as for the BW25113 parental strain. The experiment was conducted in independent triplicate assays, including the BW25113 parental strain.

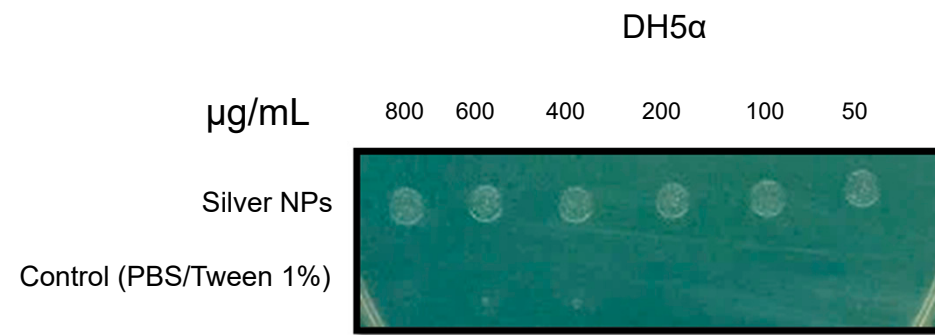

Supplement: s1 [file s1]
